## Prognostic value of HPV DNA status in cervical cancer before treatment: a systematic review and meta-analysis

Ping Li<sup>1,2,\*</sup>, Yue Tan<sup>1,2,\*</sup>, Li-Xia Zhu<sup>3,\*</sup>, Li-Na Zhou<sup>1,2</sup>, Ping Zeng<sup>2</sup>, Qin Liu<sup>3</sup>, Min-Bin Chen<sup>2</sup> and Ye Tian<sup>1</sup>

<sup>1</sup>Department of Radiotherapy and Oncology, The Second Affiliated Hospital of Soochow University, Institute of Radiotherapy and Oncology, Soochow University, Suzhou 215004, Jiangsu Province, China

<sup>2</sup>Department of Radiotherapy and Oncology, Kunshan First People's Hospital Affiliated to Jiangsu University, Kunshan 215300, Jiangsu Province, China

<sup>3</sup>Department of Gynecology, Kunshan First People's Hospital Affiliated to Jiangsu University, Kunshan 215300, Jiangsu Province, China

\*These authors contributed equally to this work and share co-first authors

**Correspondence to:** Ye Tian, **email:** dryetian@126.com

**Keywords:** HPV, cervical cancer, prognosis, overall survival, disease free survival

**Received:** January 23, 2017

**Accepted:** May 19, 2017

**Published:** June 16, 2017

Copyright: Li et al. This is an open-access article distributed under the terms of the Creative Commons Attribution License 3.0 (CC BY 3.0), which permits unrestricted use, distribution, and reproduction in any medium, provided the original author and source are credited.

### ABSTRACT

**Background:** Human papillomavirus (HPV), has been recognized as an vital preliminary event in the oncogenesis of cervical cancer. But the prognostic value is not well defined, because of past studies showing conflicting results. So we conducted this meta-analysis to evaluate whether HPV DNA status was associated with prognosis in cervical cancer.

**Materials and Methods:** A total of 17 previously published eligible studies including 2,838 cases were identified and included in this meta-analysis. Positive HPV DNA was associated with good prognosis in patients with cervical cancer (overall survival [OS]: pooled hazard ratio (HR) = 0.610, 95% confidence interval (CI) = 0.457–0.814,  $P = 0.001$ ; disease free survival [DFS]: pooled HR = 0.362, 95% CI = 0.252–0.519,  $P < 0.001$ ). Furthermore, in subgroup analysis, the results revealed that the association between HPV DNA positive cervical cancers and better OS (pooled HR = 0.534, 95 % CI = 0.355–0.804,  $P = 0.003$ ) in Mongoloid patients. Similarly, it existed in good OS (pooled HR = 0.628, 95 % CI 0.429–0.922,  $P = 0.017$ ) and DFS (pooled HR = 0.355, 95% CI = 0.226–0.559,  $P < 0.001$ ) in Caucasian patients.

**Conclusions:** HPV DNA status in cervical cancer may be a useful prognostic biomarker before carcinomas are treated. However, larger sample sizes and more comprehensive studies are required in the future studies to verify our findings.

### INTRODUCTION

Cervical cancer is one of the most common malignancies in women worldwide. Based on the results of epidemiologic studies supported by basic experimental findings, the infection of human papillomavirus (HPV), especially high-risk HPV (HPVs 16, 18, 45, 56), has been recognized as an vital preliminary event in the oncogenesis of cervical cancer [1–3]. It has been reported that 95–100% of patients with invasive carcinoma of the cervix were infected with HPV [4].

Over the past decades, a large number of studies tried to evaluate the prognostic value of HPV status in

cervical cancer, however, the exact mechanism about the prognostic factor of HPV was not totally understood. In HPV-positive cervical cancer, HPV sequences may be integrated in cells and thus enhance the expression of E6/E7 viral oncogenes to active oncogenes and alter cell growth [5]. While in HPV-negative cancers, some other oncogenes may take over E6-like and E7-like functions in tumorigenesis [6]. HPV-negative cervical cancer might represent a kind of biologically distinct tumors, which exists more frequently in node-positive cervical cancer [6] and is more often observed in such as adenocarcinomas, advanced stages [7]. Even so, more studies showed that no statistically significant difference was found between

HPV-negative and HPV-positive cases in terms of clinical stage [4, 6–21]. In spite of some authors advocated the hypothesis that adenosquamous carcinoma was associated with a poor prognosis [22], it remained controversial [23]. For example, it was reported that HPV-negative cervical cancer had a higher incidence in squamous cell carcinoma (SCC), but not adenocarcinoma (AC) [15]. From then on, more and more studies have reported the prognostic value of HPV status in cervical cancer. Most studies have suggested HPV-negative cervical cancer carried a poorer prognosis than HPV-positive [4, 6–8, 12, 16, 17, 20]. However, some studies showed HPV DNA did not have any prognostic implication [9–11, 13, 18, 19, 21].

The prognostic significance of HPV status in cervical cancer before treatment have been got conflicted results and remained unclear. The size of the sample in each study was limited. Therefore, we performed this comprehensive metaanalysis to evaluate the prognostic value of HPV status in cervical cancer, so as to illustrate which kinds of patients may require careful follow-up for recurrence and need include additional treatment.

## RESULTS

### Demographic characteristics

A total of 1,524 articles were retrieved by a literature search of the PubMed, Embase, and Web of Science databases, using different combinations of key terms. As shown in the search flow diagram (Figure 1), 1,524 records were initially retrieved using the predefined search strategy. After browsing the retrieved titles and abstracts, 1,434 of them were excluded due to non-relevant endpoint provided. The remaining 90 records were downloaded as full-text and checked one by one carefully. Furthermore, another 70 studies were excluded, including 49 that had no prognosis data, 7 were prognosis about HPV 18, 4 were about predictive value of HPV DNA in cervical cancer lymph nodes, 2 were about clinical outcome of HPV 58 type, 1 was about HPV 31 prognosis data, 4 were involving prognosis of HPV viral load, 3 were about prognosis of HPV RNA, 2 were about reviews, 1 was excluded due to the quality score was less than 6. As a result, 17 published studies met the criteria for analysis between HPV DNA status and cervical cancer prognosis.

To assess the relevance between HPV DNA and cervical cancer prognosis, 2,838 patients met the inclusion standard were finally selected for the meta-analysis. The sample-size was with a wide range from 32 to 515. Among the 17 cohorts for HPV DNA status, 11 focused on OS, 3 focused on DFS and rest 3 focused on both OS and DFS; and after categorized by races, Caucasian ( $n = 11$ ) became the major race of literatures including Europe ( $n = 10$ ) and North America ( $n = 1$ ), followed by Mongoloid ( $n = 6$ ) including Japan ( $n = 3$ ), China ( $n = 2$ ) and Korea ( $n = 1$ ), respectively.

## Evidence synthesis

The meta-analysis of HPV DNA status was based on two outcome endpoints: OS and DFS. For OS, 14 studies in total were included in the meta-analysis, inside which, given the fact that the  $P$  value of 0.004 and  $I^2$  values of 57% calculated from the heterogeneity test, a random-effects model was used. The results shown a significant association between HPV-positive cervical cancer and OS (pooled HR = 0.610, 95% CI = 0.457–0.814,  $P = 0.001$ ) (Figure 2). There were 6 studies included in the meta-analysis of DFS, of which a fixed effects model was utilized to calculate the pooled hazard ratio (HR) and 95% confidence interval (CI) on account of the  $P$  value of 0.290 and  $I^2$  values of 18.9% reported by the heterogeneity test. The results suggested that HPV-positive cervical cancer had significantly better DFS (pooled HR = 0.362, 95% CI = 0.252–0.519,  $P < 0.000$ ) (Figure 3). Subgroup study was then performed, and the results suggested that HPV-positive cervical cancer was associated with good OS in Mongoloid patients (pooled HR = 0.534, 95% CI 0.355–0.804,  $P = 0.003$ ), as well as in Caucasian (OS: pooled HR = 0.628, 95% CI 0.429–0.922,  $P = 0.017$ ; DFS: pooled HR = 0.355, 95% CI = 0.226–0.559,  $P < 0.000$ ).

### Publication bias and sensitivity analysis

Begg's funnel plot and Egger's test were applied to assess the publication in this meta-analysis. The shapes of the funnel plots showed no evidence of obvious heterogeneity. Egger's tests, following OS, DFS in cervical cancer about HPV DNA ( $P = 0.792$ ;  $P = 0.171$ ) (Figure 4), revealed no publication bias. Sensitivity analyses were further utilized to determine the influence of the results described above. No individual study dominated this meta-analysis. Removing any single study had no significant effect on the final conclusion (Figure 5).

## DISCUSSION

HPV has been identified as the key causative agent for the development of cervical cancer. Most studies had determined whether HPV DNA status before treatment was a prognostic factor in cervical carcinoma patients. However, as large centers were hardly able to recruit patients with large sample size, the conclusions from every center remained non-comprehensive.

To our knowledge, current meta-analysis is the first complete overview showing the prognosis significant of HPV DNA status in cervical cancer. We evaluated the survival data of 2,838 cervical cancer patients about HPV DNA status and included in total 17 different studies systematically. As a whole, the results clearly determine that positive HPV DNA is a better prognostic

factor in cervical cancer, with better DFS (pooled HR = 0.362, 95% CI = 0.252–0.519,  $P < 0.000$ ) and better OS (pooled HR = 0.610, 95% CI = 0.457–0.814,  $P = 0.001$ ). In subgroup analysis, the results revealed that the association between HPV DNA positive cervical cancer patients and better OS (pooled HR = 0.534, 95% CI 0.355–0.804,  $P = 0.003$ ) in Mongoloid patients. Similarly, it existed in good OS (pooled HR = 0.628, 95% CI 0.429–0.922,  $P = 0.017$ ) and DFS (pooled HR = 0.355, 95% CI = 0.226–0.559,  $P < 0.000$ ) in Caucasian patients.

Actually, as we all known, FIGO stage, lymph node status, primary tumor size, stromal invasion depth, lymph-vascular space invasion and the vaginal margins remain the common prognostic parameters for cervical cancer [24]. In current meta-analysis, it reveals that positive HPV DNA may have good OS and DFS in patients with cervical cancer. Similar meta-analysis results have also been reported in HPV-positive head and neck squamous cell carcinoma [25, 26]. It is pretty clear that due to its significant prognostic effects, HPV status of cervical cancer now should be considered as a prognostic marker before treatment. HPV negative primary cancers, which showed a great potential to metastasize, was found existing more aggressive p53 mutations than HPV positive in the normal development process, resulting in a more severe deregulation of normal growth control and a worse prognosis [6, 27]. P53 mutations detected may suggest the poor prognosis in HPV negative cervical cancer in one way. Despite our attempts to perform the explanation,

the reason of different prognosis in cervical cancer is not totally clear recently. More research from the perspective of molecular biology should be carried out to explore the complicated carcinogenesis mechanism in HPV-positive cervical cancer.

As illustrating our results, some limitations were existed in current meta-analysis. First, we limited the search of studies performing in English, and did not search conference proceedings or books, which may introduce publication bias to meta-analysis. We tried to recruit all relevant data and additional unpublished information, but some missing data were unavoidable. Second, most included studies were reported as retrospective studies, which were more likely to be published if they had positive results than negative results. Third, the heterogeneity may increase due to vary HPV genotypes existence in different center, but high-risk HPV types are dominated in cervical cancer patients among individual studies. Even though this meta-analysis has these restrictions, it still has several strengths. Initially, all the limited subsets have provided 2,838 patients, which represented a substantial number of cases and increased the statistical power in the analysis significantly. Besides, no publication biases were detected, which indicated the pooled results may be impartial.

This study is the first meta-analysis to assess the prognostic significance of HPV status in cervical cancer before treatment. Our data support the positive HPV DNA is a better prognostic factor in cervical cancer. Patients with negative HPV DNA may require careful follow-up

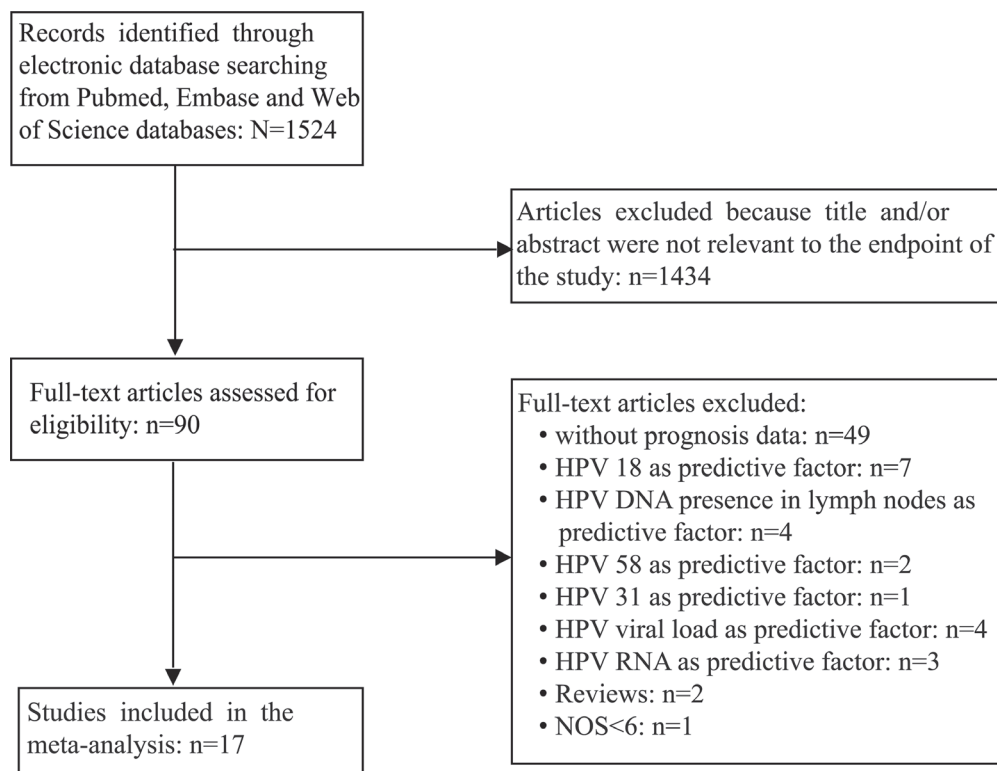

**Figure 1: The flow chart of the selection process in our meta-analysis.**

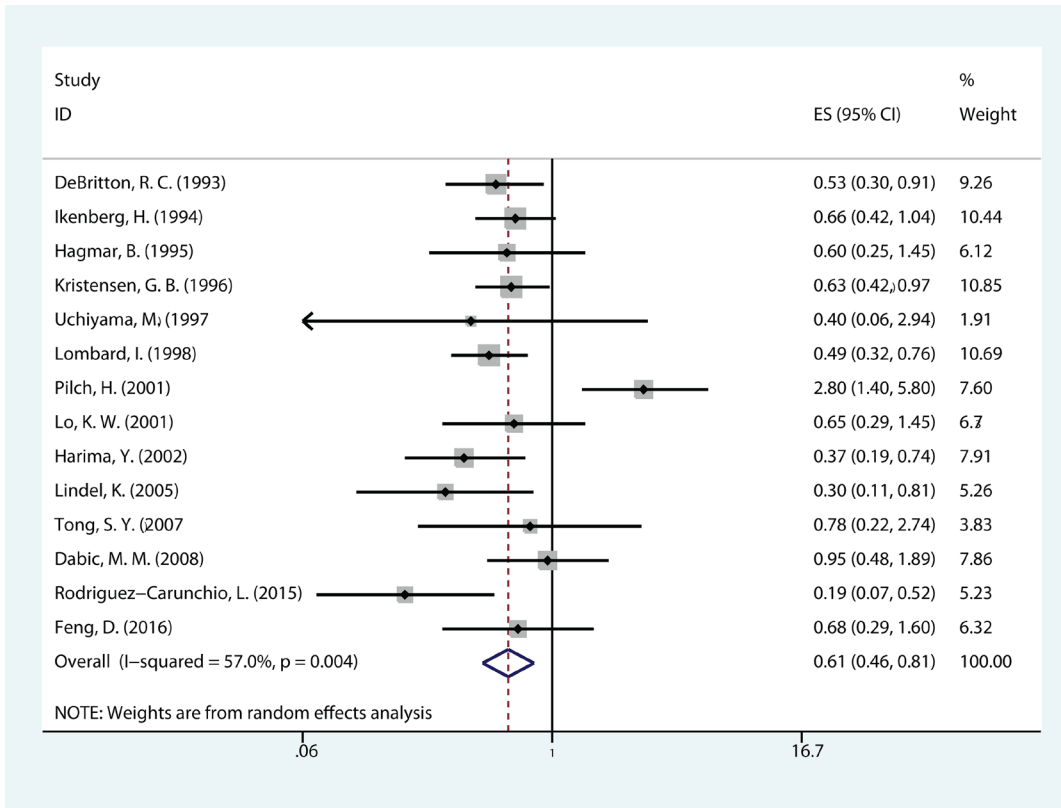

**Figure 2: The correlation between HPV-positive and overall survival (OS) CCs.**

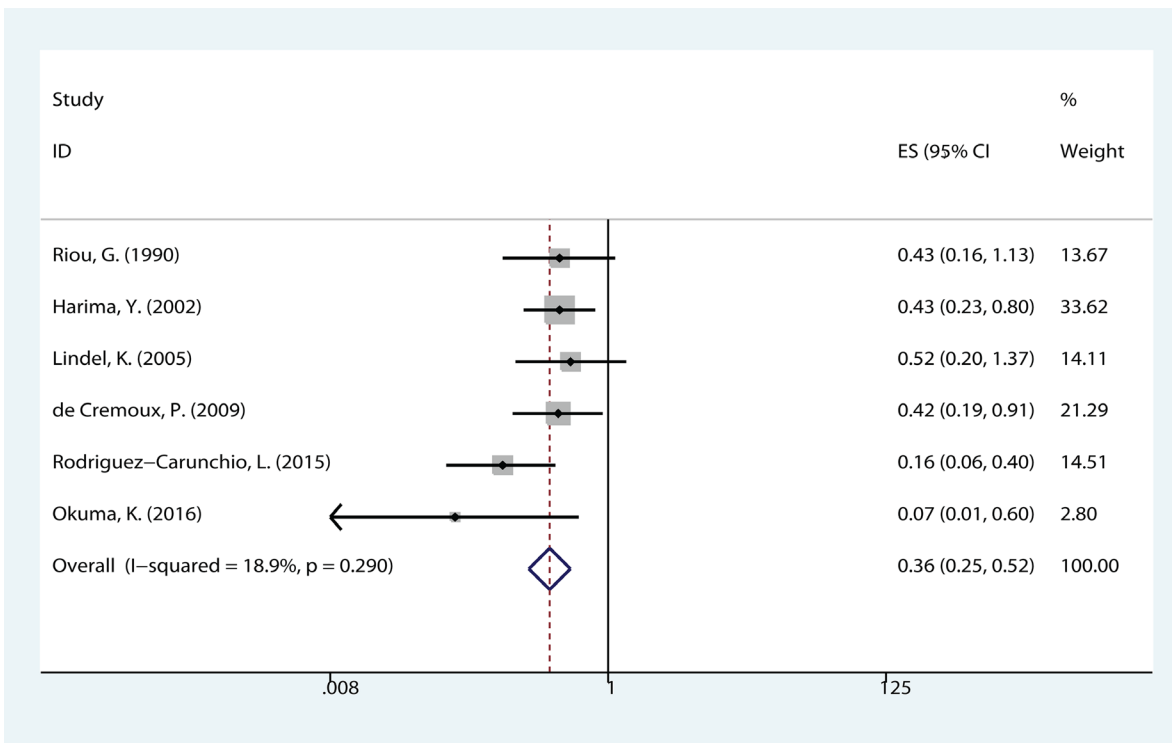

**Figure 3: The correlation between HPV-positive and disease free survival (DFS) in CCs.**



for recurrence and need include additional treatment. However, larger sample sizes and more comprehensive study designs are required in the future studies to verify our finding.

## MATERIALS AND METHODS

### Publication search

A comprehensive literature search of the electronic databases PubMed, EMBASE and Web of Science databases was performed up to November 28, 2016, with the search terms: ‘cervical cancer’, ‘cervical carcinoma’, ‘carcinoma of cervix’, ‘HPV’ and ‘prognosis’. All potentially eligible studies were retrieved and their bibliographies were carefully scanned to identify other eligible studies. Extra studies were identified by a hand search of the references cited in the original studies. When multiple studies of the same patient population were identified, we included the published report with the largest sample size. Only studies published in English were included in this meta-analysis.

### Inclusion and exclusion criteria

Studies included in this meta-analysis had to meet all of the following criteria: (a) evaluation of HPV DNA status for predicting prognosis in cervical cancer, (b) provide hazard ratios (HRs) with 95% confidence intervals (CIs) or enable calculation of these statistics from the data presented, (c) classify HPV status as ‘positive’ and ‘negative’.

Exclusion criteria were: (a) literatures were published as letters, editorials, abstracts, reviews, case reports and expert opinions; (b) experiments were performed *in vitro* or *in vivo*, but not based on patients; (c) articles were without the HRs, 95% CI, or not dealing with OS, DFS, or the K-M survival curves; (d) the follow-up duration was shorter than 3 years.

### Data extraction

Information was carefully and independently extracted from all eligible publications by two authors using a standardized form. Disagreement was resolved

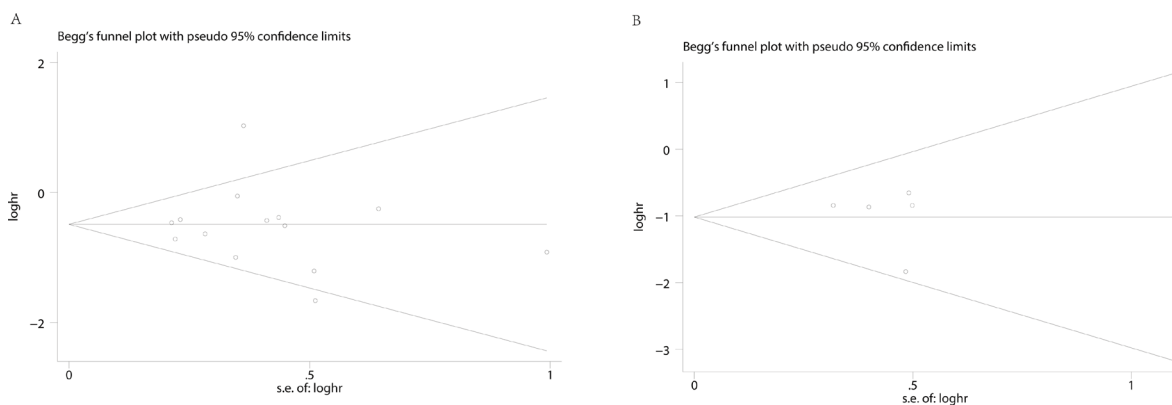

Figure 4: Begg's funnel plots for the studies involved in the meta-analysis. (A) overall survival (B) disease free survival.

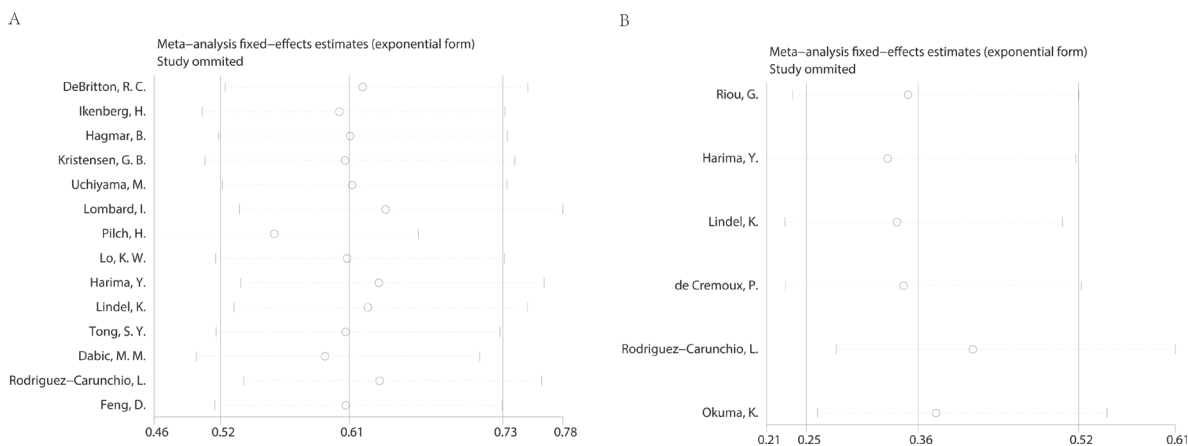

Figure 5: Sensitivity analysis of the meta-analysis. (A) overall survival (B) disease free survival.

**Table 1: Characteristics of studies included in the meta-analysis**

| author                     | year | country              | No of cases | FIGO stage | histology    | source   | method of detecting HPV | HPV genotype detected                             | endpoints | NOS |
|----------------------------|------|----------------------|-------------|------------|--------------|----------|-------------------------|---------------------------------------------------|-----------|-----|
| Riou G. [6]                | 1990 | France               | 106         | Ib-IIb     | SCC, AC      | fresh    | SBH + PCR               | 16, 18, 31, 33, 35, 39, 6, 11 and 42              | DFS       | 7   |
| DeBritton RC. [8]          | 1993 | Panama(multi-center) | 178         | I-IV       | SCC, AC, ASC | fresh    | SBH + PCR               | 16, 18 and 33                                     | OS        | 8   |
| Ikenberg H. [9]            | 1994 | Germany              | 205         | Ib-IV      | SCC, AC, ASC | fresh    | SBH + PCR               | 16, 18, 31, 35, 33 and type unknown               | OS        | 8   |
| Hagmar B. [10]             | 1995 | Sweden               | 97          | I-IV       | SCC          | paraffin | PCR                     | 16, 18, 31, 33, and type unknown                  | OS        | 8   |
| Kristensen GB. [11]        | 1996 | Norway               | 223         | I-IV       | SCC, AC, ASC | fresh    | PCR                     | 16, 18, 33 and type unknown                       | OS        | 6   |
| Uchiyama M. [12]           | 1997 | Japan                | 32          | 0-IV       | AC, ASC      | formalin | PCR                     | 16, 18 and other types                            | OS        | 6   |
| Lombard I. [13]            | 1998 | France               | 297         | I-IV       | SCC, AC, ASC | fresh    | SBH + PCR               | 16, 18, 31, 33, 58, 35, 45 and 52                 | OS        | 7   |
| Pilch H. [14]              | 2001 | Germany              | 203         | I-II       | SCC, AC, ASC | paraffin | PCR                     | 16, 18 and rare HPV types                         | OS        | 8   |
| Keith WK. Lo [15]          | 2001 | China                | 121         | I-IV       | SCC, AC      | fresh    | PCR                     | 16, 18, 31, 33, 52, 53, 56, 58 and type unknown   | OS        | 9   |
| Harima Y. [16]             | 2002 | Japan                | 84          | Ib-IVb     | SCC, AC      | fresh    | PCR                     | 16, 18, 6, 31, 33, 52 and 58                      | OS, DFS   | 7   |
| Lindel K. [17]             | 2005 | Switzerland          | 40          | I-IV       | SCC, AC, ASC | paraffin | PCR                     | 16, 6, 31 and 33                                  | OS, DFS   | 7   |
| Tong SY. [18]              | 2007 | Korea                | 97          | I-IV       | SCC, AC, ASC | fresh    | HDC + PCR               | 16, 18, 35, 33, 58, 66, 68, 31, 52 and 56         | OS        | 8   |
| Dabic MM. [19]             | 2008 | Croatia              | 51          | I-IV       | AC           | paraffin | PCR                     | 16, 18, 51, 31, 33 and 45                         | OS        | 7   |
| de Cremoux P. [20]         | 2009 | France               | 515         | I-IV       | SCC, AC      | fresh    | PCR                     | 16, 18, 45, 31, 33, 35, 39, 52, 53, 58, 59 and 73 | DFS       | 6   |
| Rodriguez-Carunchio L. [7] | 2015 | Spain                | 136         | I-IV       | SCC, AC, ASC | paraffin | PCR, HC2                | 16, 18, 45, and 68                                | OS, DFS   | 7   |
| Okuma K. [4]               | 2016 | Japan                | 71          | I-IV       | SCC, AC, ASC | fresh    | PCR                     | 16, 18, 31, 33, 39, 44, 52, 56, 58, 59, 66 and 68 | DFS       | 8   |
| Feng D. [21]               | 2016 | China                | 122         | I-III      | SCC, AC, ASC | paraffin | PCR                     | 16, 18 and other types                            | OS        | 7   |

#SCC: Squamous cell carcinoma; AC: Adenocarcinoma; ASC: adenosquamouscarcinoma.

\*SBH: Southern blot hybridization; PCR: polymerase chain reaction; HC2: Hybrid capture II assay; HDC: HPV DNA chip.

through independently extracting data from the original article by the third author, and consensus was reached by discussions. The meta-analysis of this study was based on two outcome endpoints: OS and DFS. As stated by the inclusion and exclusion criteria above, the following items were extracted from each study, including the first author's name, publication year, country of origin, number of patients analyzed, tumor stage, clinicopathologic factors, source of tissue, HPV detection method, HPV genotype detected, OS and DFS. The main features of these eligible studies were summarized in Table 1. For the articles in which prognosis was plotted only as the Kaplan-Meier curves, the Engauge Digitizer V4.1 was used to extract survival data, then applied Tierney's method to estimate the HRs and 95% CIs [28]. All studies were assessed by Newcastle-Ottawa Scale (NOS) [29]. The quality scores ranging from 6 to 9, suggested that the methodological quality was high.

### Statistical analysis

The data collected from each qualified paper was used to evaluate the association between HPV DNA status and cervical cancer prognosis through meta-analysis. Pooled HRs and 95% CIs for their outcome

endpoints (OS and DFS) were calculated. Subgroup analysis was performed when there were at least three studies in each subgroup. Statistical heterogeneity was assessed using Cochran's Q test and Higgins's  $I^2$  statistic [30],  $P$  value  $> 0.10$  and  $I^2 < 40\%$  suggested a lack of heterogeneity among studies. According to the absence or presence of heterogeneity, random effects model or fixed effects model was used to merge HR, respectively.

Funnel plots and the Egger's test were employed to evaluate the possible publication bias [31]. If a publication bias did exist, its influence on the overall effect was assessed by the Duval and Tweedie's trim and fill method [32]. Sensitivity analysis was also performed to estimate if certain single article could influence the overall result. Statistical analyses were conducted using Stata 14.0 (StataCorp, College Station, TX).  $P$  values for comparisons were two-tailed and statistical significance was defined as  $p < 0.05$  for all tests, except those ones with heterogeneity.

### CONFLICTS OF INTEREST

The authors have declared that no competing interests exist.

## GRANT SUPPORT

This work is supported by the National Natural Science Foundation (Grant numbers: 81472786); Suzhou Municipal Health Bureau projects (Grant number: LCZX201318, LCZX201619); The Foundation of tumor clinical and basic research team (KYC005).

## REFERENCES

- Walboomers JM, Jacobs MV, Manos MM, Bosch FX, Kummer JA, Shah KV, Snijders PJ, Peto J, Meijer CJ, Muñoz N. Human papillomavirus is a necessary cause of invasive cervical cancer worldwide. *Journal of Pathology*. 1999; 189:12–9.
- Bosch FX, Lorincz A, Muñoz N, Meijer CJ, Shah KV. The causal relation between human papillomavirus and cervical cancer. *Journal of Clinical Pathology*. 2002; 55:244–65.
- Bosch FX, Manos MM, Muñoz N, Sherman M, Jansen AM, Peto J, Schiffman MH, Moreno V, Kurman R, Shan KV. Prevalence of Human Papillomavirus in Cervical Cancer: a Worldwide Perspective. *Journal of the National Cancer Institute*. 1995; 87:796–802.
- Okuma K, Yamashita H, Yokoyama T, Nakagawa K, Kawana K. Undetected human papillomavirus DNA and uterine cervical carcinoma: Association with cancer recurrence. *Strahlenther Onkol*. 2016; 192:55–62. doi: 10.1007/s00066-015-0909-0.
- Hausen HZ. Papillomaviruses in anogenital cancer as a model to understand the role of viruses in human cancers. *Cancer Research*. 1989; 49:4677–81.
- Riou G, Favre M, Jeannel D, Bourhis J, Le Doussal V, Orth G. Association between poor prognosis in early-stage invasive cervical carcinomas and non-detection of HPV DNA. *Lancet*. 1990; 335:1171–4.
- Rodriguez-Carunchio L, Soveral I, Steenbergen RD, Torne A, Martinez S, Fuste P, Pahisa J, Marimon L, Ordi J, del Pino M. HPV-negative carcinoma of the uterine cervix: a distinct type of cervical cancer with poor prognosis. *Bjog*. 2015; 122:119–27. doi: 10.1111/1471-0528.13071.
- DeBritton RC, Hildesheim A, De Lao SL, Brinton LA, Sathya P, Reeves WC. Human papillomaviruses and other influences on survival from cervical cancer in Panama. *Obstet Gynecol*. 1993; 81:19–24.
- Ikenberg H, Sauerbrei W, Schottmuller U, Spitz C, Pfeleiderer A. Human papillomavirus DNA in cervical carcinoma—correlation with clinical data and influence on prognosis. *Int J Cancer*. 1994; 59:322–6.
- Hagmar B, Christensen JJ, Johansson B, Kalantari M, Ryd W, Skyldberg B, Walaas L, Warleby B, Kristensen GB. Implications of human papillomavirus type for survival in cervical squamous cell carcinoma. *Int J Gynecol Cancer*. 1995; 5:341–5.
- Kristensen GB, Karlsen F, Jenkins A, Kaern J, Abeler VM, Trope CG. Human papilloma virus has no prognostic significance in cervical carcinoma. *Eur J Cancer*. 1996; 32a: 1349–53.
- Uchiyama M, Iwasaka T, Matsuo N, Hachisuga T, Mori M, Sugimori H. Correlation between human papillomavirus positivity and p53 gene overexpression in adenocarcinoma of the uterine cervix. *Gynecol Oncol*. 1997; 65:23–9. doi: 10.1006/gyno.1997.4613.
- Lombard I, Vincent-Salomon A, Validire P, Zafrani B, de la Rochefordiere A, Clough K, Favre M, Pouillart P, Sastre-Garau X. Human papillomavirus genotype as a major determinant of the course of cervical cancer. *J Clin Oncol*. 1998; 16:2613–9.
- Pilch H, Gunzel S, Schaffer U, Tanner B, Brockerhoff P, Maeurer M, Hockel M, Hommel G, Knapstein PG. The presence of HPV DNA in cervical cancer: correlation with clinico-pathologic parameters and prognostic significance: 10 years experience at the Department of Obstetrics and Gynecology of the Mainz University. *Int J Gynecol Cancer*. 2001; 11:39–48.
- Lo KW, Cheung TH, Chung TK, Wang VW, Poon JS, Li JC, Lam P, Wong YF. Clinical and prognostic significance of human papillomavirus in a Chinese population of cervical cancers. *Gynecol Obstet Invest*. 2001; 51:202–7.
- Harima Y, Sawada S, Nagata K, Sougawa M, Ohnishi T. Human papilloma virus (HPV) DNA associated with prognosis of cervical cancer after radiotherapy. *Int J Radiat Oncol Biol Phys*. 2002; 52:1345–51.
- Lindel K, Burri P, Studer HU, Altermatt HJ, Greiner RH, Gruber G. Human papillomavirus status in advanced cervical cancer: predictive and prognostic significance for curative radiation treatment. *Int J Gynecol Cancer*. 2005; 15:278–84. doi: 10.1111/j.1525-1438.2005.15216.x.
- Tong SY, Lee YS, Park JS, Namkoong SE. Human papillomavirus genotype as a prognostic factor in carcinoma of the uterine cervix. *Int J Gynecol Cancer*. 2007; 17:1307–13. doi: 10.1111/j.1525-1438.2007.00933.x.
- Dabic MM, Nola M, Tomicic I, Dotlic S, Petroveckii M, Jukic S. Adenocarcinoma of the uterine cervix: prognostic significance of clinicopathologic parameters, flow cytometry analysis and HPV infection. *Acta Obstet Gynecol Scand*. 2008; 87:366–72. doi: 10.1080/00016340801936560.
- de Cremoux P, de la Rochefordiere A, Savignoni A, Kirova Y, Alran S, Fourchette V, Plancher C, Thioux M, Salmon RJ, Cottu P, Mignot L, Sastre-Garau X. Different outcome of invasive cervical cancer associated with high-risk versus intermediate-risk HPV genotype. *Int J Cancer*. 2009; 124:778–82. doi: 10.1002/ijc.24075.
- Feng D, Xu H, Li X, Wei Y, Jiang H, Xu H, Luo A, Zhou F. An association analysis between mitochondrial DNA content, G10398A polymorphism, HPV infection, and the prognosis of cervical cancer in the Chinese Han population. *Tumour Biol*. 2016; 37:5599–607. doi: 10.1007/s13277-015-4429-4.

22. Gallup DG, Harper RH, Stock RJ. Poor prognosis in patients with adenosquamous cell carcinoma of the cervix. *Obstetrics & Gynecology*. 1985; 65:416.
23. Yazigi R, Sandstad J, Munoz AK, Choi DJ, Nguyen PD, Risser R. Adenosquamous carcinoma of the cervix: prognosis in stage IB. *Obstetrics & Gynecology*. 1990; 75:1012–5.
24. Zampranha Rde A, Freitas-Junior R, Murta EF, Michelin MA, Barbaresco AA, Adad SJ, Oliveira AM, Rassi AB, Oton GJ. Human papillomavirus types 16 and 18 and the prognosis of patients with stage I cervical cancer. *Clinics (Sao Paulo)*. 2013; 68:809–14. doi: 10.6061/clinics/2013(06)14.
25. Liu H, Li J, Zhou Y, Hu Q, Zeng Y, Mohammadreza MM. Human papillomavirus as a favorable prognostic factor in a subset of head and neck squamous cell carcinomas: A meta-analysis. *J Med Virol*. 2016; 89:710–725. doi: 10.1002/jmv.24670.
26. Rainsbury JW, Ahmed W, Williams HK, Roberts S, Paleri V, Mehanna H. Prognostic biomarkers of survival in oropharyngeal squamous cell carcinoma: systematic review and meta-analysis. *Head Neck*. 2013; 35:1048–55. doi: 10.1002/hed.22950.
27. Crook T, Vousden KH. Properties of p53 mutations detected in primary and secondary cervical cancers suggest mechanisms of metastasis and involvement of environmental carcinogens. *Embo j*. 1992; 11:3935–40.
28. Tierney JF, Stewart LA, Ghersi D, Burdett S, Sydes MR. Practical methods for incorporating summary time-to-event data into meta-analysis. *Trials*. 2007; 8:16.
29. Stang A. Critical evaluation of the Newcastle-Ottawa scale for the assessment of the quality of nonrandomized studies in meta-analyses. *European Journal of Epidemiology*. 2010; 25:603–5.
30. Higgins JP, Thompson SG, Deeks JJ, Altman DG. Measuring inconsistency in meta-analyses. *British Medical Journal*. 2003; 327:557–60.
31. Egger M, Davey SG, Schneider M, Minder C. Bias in meta-analysis detected by a simple, graphical test. *BMJ*. 1997; 315.
32. Duval S, Tweedie R. Trim and Fill: A Simple Funnel-Plot-Based Method of Testing and Adjusting for Publication Bias in Meta-Analysis. *Biometrics*. 2000; 56:455–63.
